# Supplementary material for: Enhanced ultrafast cubic nonlinearity in the carbazole–picric acid complex for potential applications in photonic devices: Kerr nonlinearity with two-photon absorption
Source: Royal Society of Chemistry journal article supplement (doi:10.1039/d5cp00665a), 2025-01-01
Supplement: d5cp00665a1.pdf [file d5cp00665a1.pdf]

## SUPPLEMENTARY INFORMATION

### **Enhanced ultrafast cubic nonlinearity in the carbazole-picric acid complex for potential applications in photonic devices: Kerr nonlinearity with two-photon absorption**

*Mohd Mehkoom<sup>1</sup>, Farman Ali<sup>2</sup>, Amit K. Pradhan<sup>3</sup>, Prasanta K. Datta<sup>3\*</sup>, Umakanta Tripathy<sup>1§</sup>*

<sup>1</sup>Department of Physics, Indian Institute of Technology (Indian School of Mines) Dhanbad,  
Dhanbad-826004, Jharkhand, India

<sup>2</sup>Department of Applied Chemistry, Faculty of Engineering and Technology, Aligarh Muslim  
University, Aligarh-202002, India

<sup>3</sup>Department of Physics, Indian Institute of Technology Kharagpur, Kharagpur-721302, India

Corresponding Authors Email: [\\*pkdatta@phy.iitkgp.ac.in](mailto:*pkdatta@phy.iitkgp.ac.in), [\\$utripathy@iitism.ac.in](mailto:$utripathy@iitism.ac.in)

## 1. Synthesis of Cz-PA complex

The 3-D view structure of the Cz-PA complex is represented in **Figure S1**.

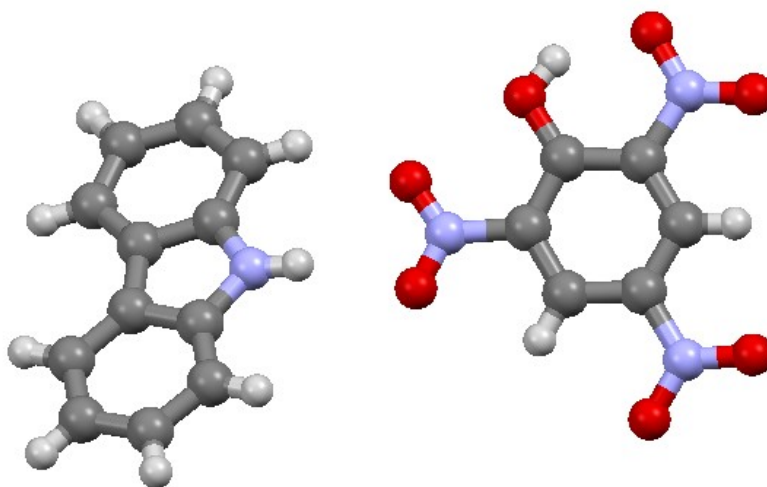

**Figure S1.** 3-D view of complex Cz-PA.

## 2. Single Crystal XRD (SC-XRD) analysis

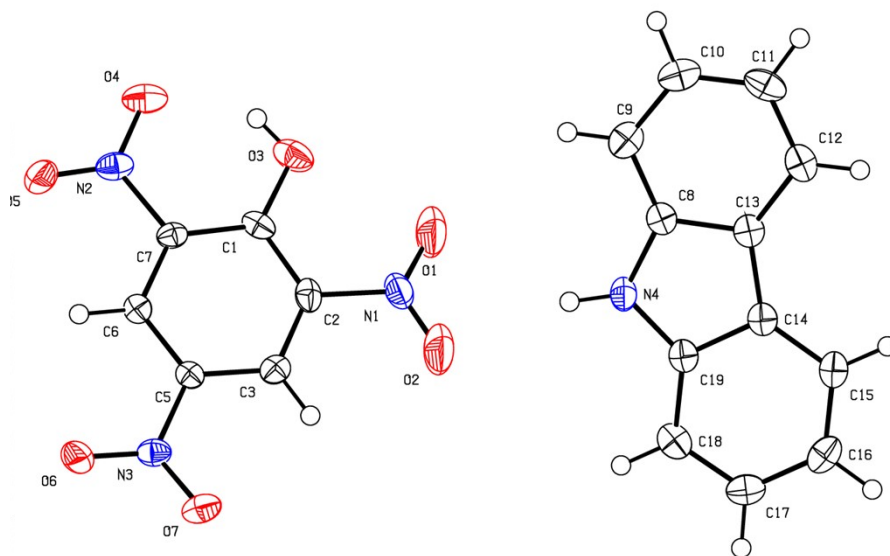

**Figure S2.** The ORTEP view plot of complex Cz-PA for crystal data.

**Table S1.** Anisotropic Displacement Parameters ( $\text{\AA}^2 \times 10^3$ ) for Cz-PA. The Anisotropic displacement factor exponent takes the form:  $-2\pi^2[h^2a^{*2}U_{11}+2hka^*b^*U_{12}+\dots]$ .

| Atom | $U_{11}$ | $U_{22}$ | $U_{33}$ | $U_{12}$ | $U_{13}$  |
|------|----------|----------|----------|----------|-----------|
| O1   | 387(9)   | 50.9(17) | 31.6(15) | 43(3)    | -2(3)     |
| O2   | 387(9)   | 50.9(17) | 31.6(15) | 43(3)    | -2(3)     |
| O3   | 34.1(14) | 21.6(13) | 50.2(17) | 2.7(12)  | -12.2(14) |
| O4   | 36.6(15) | 29.2(14) | 47.9(17) | 3.2(12)  | 1.6(13)   |
| O5   | 51.2(18) | 37.0(15) | 23.6(13) | -8.6(14) | 6.7(13)   |
| O6   | 47.6(17) | 22.8(13) | 33.7(14) | 5.5(13)  | -9.4(13)  |
| O7   | 34.6(15) | 31.3(14) | 32.7(14) | 3.4(12)  | -2.4(12)  |
| N1   | 42(2)    | 27.7(16) | 31.4(17) | -7.4(16) | -9.7(15)  |
| N2   | 22.5(15) | 26.8(16) | 32.6(17) | -3.5(13) | 2.1(13)   |
| N3   | 20.8(14) | 22.5(14) | 29.1(15) | 1.3(12)  | -3.0(13)  |
| N4   | 26.9(15) | 28.7(16) | 21.3(14) | -2.3(14) | -1.5(12)  |
| C1   | 13.9(15) | 16.9(15) | 34.1(18) | -0.7(13) | -4.2(14)  |
| C2   | 18.8(16) | 28.5(19) | 23.0(17) | -8.0(15) | -3.0(14)  |
| C3   | 15.5(15) | 26.4(17) | 23.0(17) | -5.6(14) | -0.3(13)  |
| C5   | 14.4(15) | 19.0(15) | 23.4(16) | -1.8(13) | -2.6(13)  |
| C6   | 14.6(14) | 21.7(16) | 22.6(17) | 1.9(13)  | -2.1(13)  |
| C7   | 17.4(15) | 21.3(16) | 22.9(16) | -3.0(14) | 1.9(14)   |
| C8   | 15.5(15) | 25.5(17) | 26.4(18) | 2.3(15)  | 1.7(13)   |
| C9   | 20.6(17) | 40(2)    | 28.5(19) | -1.6(17) | 1.9(15)   |
| C10  | 21.5(18) | 38(2)    | 39(2)    | -1.4(17) | 0.8(15)   |
| C11  | 22.5(18) | 21.5(18) | 53(2)    | 6.7(16)  | 5.3(17)   |
| C12  | 17.2(16) | 30.7(19) | 33.3(19) | 2.6(15)  | 3.9(14)   |
| C13  | 12.1(15) | 27.4(17) | 26.7(17) | 1.4(14)  | 1.7(13)   |
| C14  | 16.3(16) | 26.7(18) | 25.5(18) | 4.3(15)  | 0.4(13)   |
| C15  | 19.2(16) | 33(2)    | 23.9(17) | 3.8(15)  | 1.2(14)   |
| C16  | 21.5(18) | 43(2)    | 23.7(17) | 8.6(16)  | -0.1(14)  |
| C17  | 18.5(16) | 29.1(19) | 36(2)    | 4.3(16)  | 2.8(15)   |
| C18  | 16.3(16) | 29.0(19) | 37(2)    | -1.2(14) | -1.3(15)  |

|     |          |          |          |         |         |
|-----|----------|----------|----------|---------|---------|
| C19 | 16.1(16) | 26.3(18) | 25.5(17) | 4.5(14) | 0.2(13) |
|-----|----------|----------|----------|---------|---------|

**Table S2.** Bond Lengths for Cz-PA.

| Atom | Atom | Length/Å | Atom | Atom | Length/Å |
|------|------|----------|------|------|----------|
| O1   | N1   | 1.144(5) | C5   | C6   | 1.382(5) |
| O2   | N1   | 1.141(5) | C6   | C7   | 1.375(5) |
| O3   | C1   | 1.323(4) | C8   | C9   | 1.402(5) |
| O4   | N2   | 1.246(4) | C8   | C13  | 1.416(5) |
| O5   | N2   | 1.205(4) | C9   | C10  | 1.376(6) |
| O6   | N3   | 1.233(4) | C10  | C11  | 1.384(6) |
| O7   | N3   | 1.226(4) | C11  | C12  | 1.391(5) |
| N1   | C2   | 1.458(4) | C12  | C13  | 1.396(5) |
| N2   | C7   | 1.464(4) | C13  | C14  | 1.445(5) |
| N3   | C5   | 1.460(4) | C14  | C15  | 1.399(5) |
| N4   | C8   | 1.377(5) | C14  | C19  | 1.412(5) |
| N4   | C19  | 1.384(5) | C15  | C16  | 1.384(5) |
| C1   | C2   | 1.410(5) | C16  | C17  | 1.397(5) |
| C1   | C7   | 1.410(5) | C17  | C18  | 1.382(5) |
| C2   | C3   | 1.386(5) | C18  | C19  | 1.394(5) |
| C3   | C5   | 1.380(5) |      |      |          |

**Table S3.** Bond Angles for Cz-PA.

| Atom | Atom | Atom | Angle/°  | Atom | Atom | Atom | Angle/°  |
|------|------|------|----------|------|------|------|----------|
| O2   | N1   | O1   | 117.8(4) | C6   | C7   | N2   | 116.9(3) |
| C2   | N1   | O1   | 121.1(4) | C6   | C7   | C1   | 122.7(3) |
| C2   | N1   | O2   | 120.5(3) | C9   | C8   | N4   | 129.5(3) |
| O5   | N2   | O4   | 123.3(3) | C13  | C8   | N4   | 109.1(3) |
| C7   | N2   | O4   | 117.9(3) | C13  | C8   | C9   | 121.3(3) |
| C7   | N2   | O5   | 118.9(3) | C10  | C9   | C8   | 117.3(4) |
| O7   | N3   | O6   | 124.3(3) | C11  | C10  | C9   | 122.4(4) |
| C5   | N3   | O6   | 117.4(3) | C12  | C11  | C10  | 120.8(4) |
| C5   | N3   | O7   | 118.3(3) | C13  | C12  | C11  | 118.6(3) |
| C19  | N4   | C8   | 109.2(3) | C12  | C13  | C8   | 119.6(3) |
| C2   | C1   | O3   | 120.2(3) | C14  | C13  | C8   | 106.1(3) |

|    |    |    |          |     |     |     |          |
|----|----|----|----------|-----|-----|-----|----------|
| C7 | C1 | O3 | 124.0(3) | C14 | C13 | C12 | 134.3(3) |
| C7 | C1 | C2 | 115.8(3) | C15 | C14 | C13 | 133.6(3) |
| C1 | C2 | N1 | 120.6(3) | C19 | C14 | C13 | 107.0(3) |
| C3 | C2 | N1 | 116.8(3) | C19 | C14 | C15 | 119.3(3) |
| C3 | C2 | C1 | 122.6(3) | C16 | C15 | C14 | 118.8(3) |
| C5 | C3 | C2 | 118.4(3) | C17 | C16 | C15 | 121.1(3) |
| C3 | C5 | N3 | 119.0(3) | C18 | C17 | C16 | 121.4(4) |
| C6 | C5 | N3 | 119.2(3) | C19 | C18 | C17 | 117.7(3) |
| C6 | C5 | C3 | 121.8(3) | C14 | C19 | N4  | 108.5(3) |
| C7 | C6 | C5 | 118.8(3) | C18 | C19 | N4  | 129.7(3) |
| C1 | C7 | N2 | 120.5(3) | C18 | C19 | C14 | 121.7(3) |

**Table S4.** Hydrogen Atom Coordinates ( $\text{\AA}\times 10^4$ ) and Isotropic Displacement Parameters ( $\text{\AA}^2\times 10^3$ ) for Cz-PA.

| Atom | x         | y         | z           | U(eq)    |
|------|-----------|-----------|-------------|----------|
| H3   | -4440(80) | -1246(16) | -3380.4(15) | 53.0(10) |
| H4   | -3837(4)  | -1731(3)  | -5475.7(10) | 30.8(8)  |
| H3a  | -2979(5)  | -5840(4)  | -4445.6(12) | 26.0(9)  |
| H6   | -3091(5)  | -6072(4)  | -2987.8(12) | 23.5(8)  |
| H9   | -2639(5)  | 975(5)    | -5034.7(13) | 35.8(10) |
| H10  | -1718(5)  | 3493(5)   | -5215.2(15) | 39.4(11) |
| H11  | -1636(5)  | 4392(4)   | -5998.1(15) | 38.9(11) |
| H12  | -2422(5)  | 2765(4)   | -6643.8(13) | 32.4(10) |
| H15  | -3382(5)  | 140(4)    | -7235.2(12) | 30.4(10) |
| H16  | -4224(5)  | -2301(5)  | -7521.9(13) | 35.2(10) |
| H17  | -4913(5)  | -4311(4)  | -6992.2(13) | 33.6(10) |
| H18  | -4735(5)  | -3951(4)  | -6159.0(14) | 32.8(10) |

### 3. Fourier-Transform Infrared (FTIR) Spectroscopy

Fourier-transform infrared (FTIR) spectra of the Cz-PA complex and its constituents are shown in **Figure S3** and **Figure 1(b)**. Generally, O-H, N-H, and C-H (aromatic) symmetric stretching vibrations are observed above  $3000\text{ cm}^{-1}$  in the FTIR spectrum <sup>1</sup>. The observed shifts in characteristic bands, attributed to the stretching and bending vibrations of OH, NH, and CH functional groups in the FTIR spectrum of the complex, confirm crystal formation. These shifts result from intermolecular interactions, which are essential for the development of the crystal structure. A comparison of the FTIR spectra of the complex and its components reveals that the bands of the complex have shifted, indicating the influence of these intermolecular interactions <sup>2</sup>. In the FTIR spectrum of the complex, the peak at  $3419\text{ cm}^{-1}$  is due to the O-H stretching vibration. The N-H stretching vibration is observed at  $3346\text{ cm}^{-1}$ . The bands at  $3086$ ,  $3078$ , and  $3050\text{ cm}^{-1}$  appeared due to aromatic C-H symmetric stretching vibrations. C=C (aromatic) stretching vibrations are observed at  $1651$ ,  $1630$ ,  $1610$  and  $1565\text{ cm}^{-1}$ . The peak at  $1560\text{ cm}^{-1}$  is allocated for NO<sub>2</sub> (aromatic) asymmetric stretching vibration. The peaks at  $1451$  and  $1435\text{ cm}^{-1}$  are assigned to C-H bending vibrations. The NO<sub>2</sub> symmetric stretching vibration is observed at  $1364\text{ cm}^{-1}$ . The C-N stretching vibration is marked at  $1335\text{ cm}^{-1}$ . The C-C stretching vibration is observed at  $1240\text{ cm}^{-1}$ . The C-O stretching vibration is found at  $1270\text{ cm}^{-1}$ . The peak at  $1162\text{ cm}^{-1}$  is attributed to the C-H in-plane bending vibration. The observed peaks at  $1108$  and  $704\text{ cm}^{-1}$  are found for N-H in-plane and out-of-plane bending vibration, respectively. The C-C-O stretching vibrations are marked at  $1108$  and  $1080\text{ cm}^{-1}$ . The C-NO<sub>2</sub> stretching vibration is observed at  $909\text{ cm}^{-1}$ . The peaks at  $796$  and  $547\text{ cm}^{-1}$  are allocated for NO<sub>2</sub> wagging and rocking vibrations, respectively.

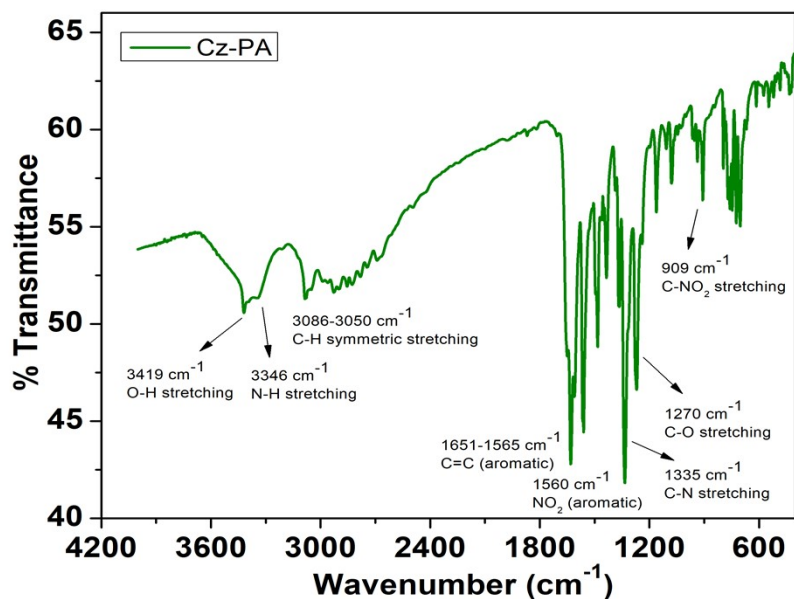

**Figure S3.** IR spectrum of Cz-PA complex.

#### 4. Photophysical Study and UV-Vis Absorption Analysis

To investigate the photophysical properties of the Cz-PA complex, UV-Vis absorption spectral measurements of carbazole (Cz), picric acid (PA), and their complex (Cz-PA) were carried out using a UV/Vis spectrophotometer. The absorption characteristics provide insight into the electronic transitions within the materials, which are crucial for understanding their potential applications in optoelectronics and photonic devices. UV-Vis absorption spectra (shown in **Figure 2(a)**) of Cz, PA, and complex Cz-PA were recorded in ethanol at a concentration of 0.1 mM at room temperature in quartz cuvettes with a path length of 1 cm.

The absorption coefficient  $\alpha_0$  is a crucial parameter in understanding the optical properties of materials and can be calculated using the following relation

$$\alpha_0 = \frac{2.303 * A}{t}$$

or equivalently,

$$\alpha_0 = \frac{2.303 \log \left( \frac{1}{T} \right)}{t}$$

Where A is the absorbance, T is the percentage transmittance, and t is the thickness of the sample. Transmittance (T) is expressed as  $T = 10^{-A} \times 100$ .

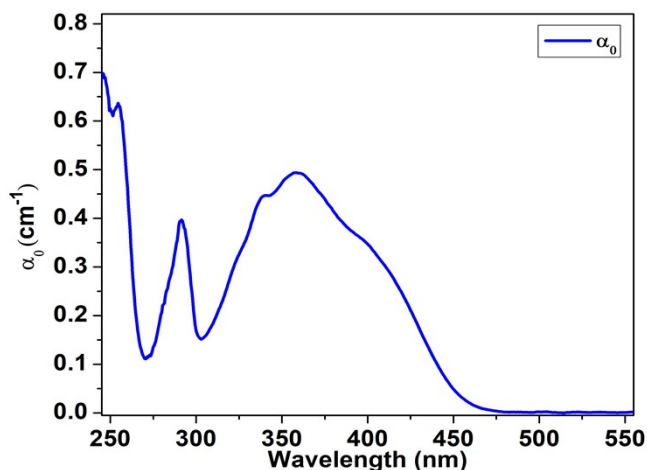

**Figure S4.** Variation of the absorption coefficient of Cz-PA complex with wavelength of light.

The variation of the absorption coefficient ( $\alpha_0$ ) with wavelength (shown in **Figure S4**) provides valuable insight into the interaction of light with the material. In **Figure S4**, the relationship between the absorption coefficient and the wavelength is illustrated, showing how ( $\alpha_0$ ) varies for the Cz-PA complex. This relationship is important for further understanding the optical band gap and the electronic transitions observed in the material. The absorption coefficient,  $\alpha_0 = 0.15 \text{ cm}^{-1}$  is noted at the corresponding laser excitation of 520 nm for optical nonlinear calculations.

The optical band gap of the Cz-PA complex was determined using the Tauc relation <sup>3</sup>, which is often applied to estimate the band gap of organic materials as follows

$$(h\nu\alpha_0)^2 = B(h\nu - E_g)$$

where  $\alpha_0$  is the absorption coefficient,  $h\nu$  is the photon energy,  $E_g$  is the optical band gap, and B is a constant. The band gap of the Cz-PA complex, calculated from the absorption onset using a



Tauc plot is found to be 2.83 eV. This relatively low band gap indicates the potential of the complex for applications in optoelectronic devices where charge transfer interactions are crucial.

## **5. Ultrafast Optical Nonlinearity**

Ultrafast Optical Nonlinearity was done using Z-scan setup (schematic shown in **Figure S5**) with femtosecond laser system. In this experiment, the sample was translated across the focal point using the motorized translated stage (GTS 150 Newport, USA) linked to a motion controller (ESP 301 Newport, USA). The transmittance beam was split using a beam splitter [90(T)/10(R)] in order to determine the CA and OA signals. A silicon photodiode (Thorlab, PDA100A, USA) was positioned behind a 1.5 mm aperture to detect the transmitted beam from the splitter to determine the CA signal, while another Si photodiode was used to collect the entire reflected beam in order to determine the OA signal. To prevent saturation, variable neutral density filters were positioned in front of both photodiodes. Two lock-in amplifiers (Signal Recovery 7225, AMETEK Scientific Instruments, USA) recorded the CA and OA signals in response to a 1 kHz transistor-transistor logic pulse generated by the pulse delay generator (SDG Elite, Coherent, USA). Another photodiode gathered a second reference signal reflected by a beam splitter placed in front of the laser system. A LabVIEW 2014 environment incorporated a motorized translational stage and lock-in amplifier for automation and data averaging.

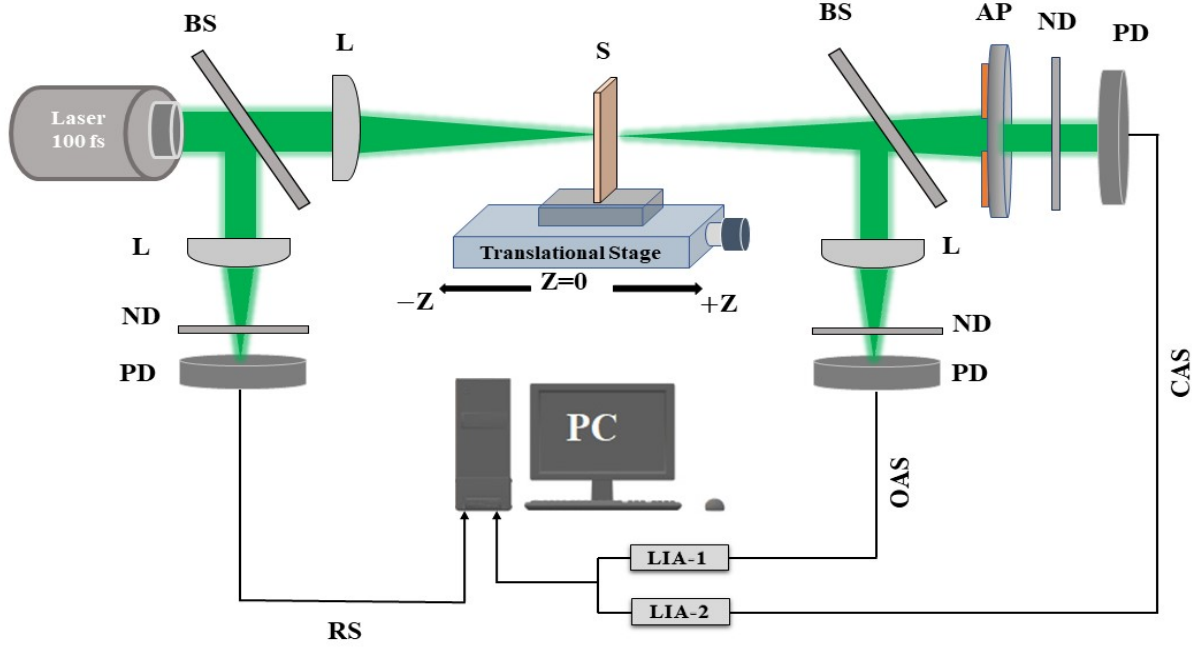

**Figure S5.** Z-scan setup for measurements of cubic optical nonlinearity (**BS**: Beam Splitter, **L**: Lens, **S**: Sample, **AP**: Aperture, **ND**: Neutral-density filter, **PD**: Photodiode, **LIA**: Lock-in amplifier, **CAS**: Closed-Aperture Signal, **OAS**: Open-Aperture Signal, **RS**: Reference Signal).

The peak intensity of the excitation laser ( $I_0$ ) is determined via the following expression

$$I_0 = \frac{2 \times \text{Average Power}}{\pi w_0^2 \times \text{Pulse Width} \times \text{Repetition Rate}}$$

Where  $w_0$  is the beam waist at the focus,  $w_0 = 30 \mu\text{m}$ , Pulse Width = 100 fs, Repetition Rate = 1 kHz. For example, the computed peak intensity for an average peak power of 0.05 mW is 35 GW/cm<sup>2</sup>.

In Z-scheme experiments, the coefficient of nonlinear refraction ( $n_2$ ) is indirectly related to peak-valley transmittance change referred to as  $\Delta T_{P-V} = 0.406(1-S)^{0.25}|\Delta\Phi_0|$ , where the on-axis phase change ( $\Delta\phi_0$ ) at focus due to nonlinear refraction <sup>4,5</sup>.  $S$  is linear aperture transmittance,  $S = 1 - \exp\left(-2r_a^2/w_a^2\right)$  with aperture size ( $r_a$ ) of 1.5 mm and laser beam size ( $w_a$ ) at aperture.

The change in CA normalized transmittance of peak and valley ( $\Delta T_{P-V}$ ) (obtained from **Figure 3**) and the phase shift ( $\Delta\phi_0$ ) due to nonlinear refraction is also noted with the variation of peak intensity and given in **Table S5** and it signifies that the variation of  $\Delta T_{P-V}$  with peak intensity increases due to large phase shifts (For the small aperture size,  $\Delta\phi_0 \leq \pi$ ) at the higher peak intensity. Consequently, the nonlinear refraction becomes enhanced at higher peak intensity.

**Table S5.** Closed aperture Z-scan parameters for Cz-PA complex.

| Peak Intensity<br>GW/cm <sup>2</sup> | $\Delta z_{P-V}$<br>mm | $\Delta T_{P-V}$<br>a.u. | $\Delta\phi_0$ |
|--------------------------------------|------------------------|--------------------------|----------------|
| 35                                   | 09.15                  | 0.342                    | 0.915          |
| 57                                   | 10.15                  | 0.801                    | 1.863          |
| 85                                   | 10.47                  | 1.022                    | 2.995          |

$\Delta z_{P-V}$ : Normalized transmittance peak-to-valley position separation,  
 $\Delta T_{P-V}$ : Change in normalized transmittance of peak and valley,  
 $\Delta\phi_0$ : Phase shift due to nonlinear refraction

## References

- 1 M. Raish, M. J. Alam, M. Mehkoom, Sultan, M. Ahmad, S. M. Afzal and S. Ahmad, *J. Mol. Struct.*, 2024, **1314**, 138713.
- 2 M. Raish, M. J. Alam, M. Ahmad and S. Ahmad, *J. Mol. Struct.*, 2023, **1290**, 135975.
- 3 J. Klein, L. Kampermann, B. Mockenhaupt, M. Behrens, J. Strunk and G. Bacher, *Adv. Funct. Mater.*, , DOI:10.1002/adfm.202304523.
- 4 M. Sheik-Bahae, A. A. Said, T. H. Wei, D. J. Hagan and E. W. Van Stryland, *IEEE J. Quantum Electron.*, 1990, **26**, 760–769.
- 5 T. Xia, D. J. Hagan, M. Sheik-Bahae and E. W. Van Stryland, *Opt. Lett.*, 1994, **19**, 317.
